# Supplementary material
Source: PubMed Central journal article supplement (PMC4827449)

*Dspp*/DSP

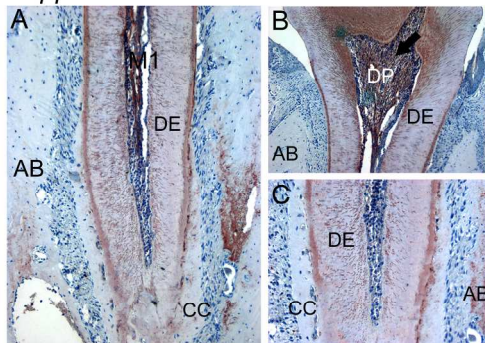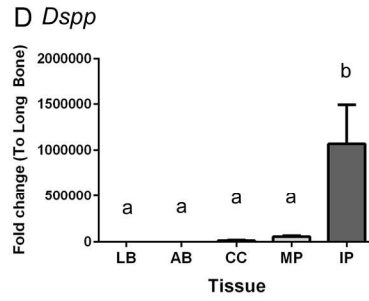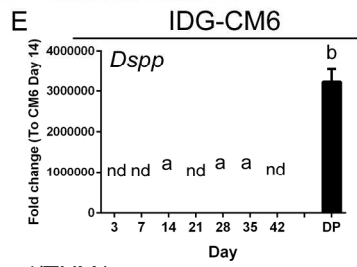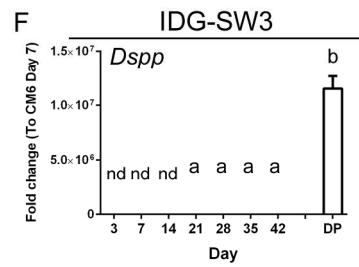

*Thy1*/THY1

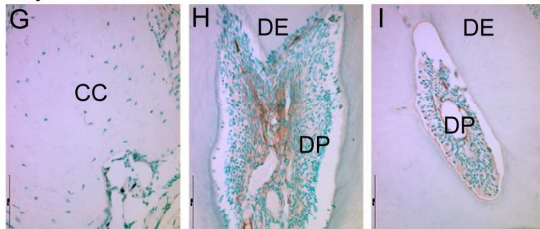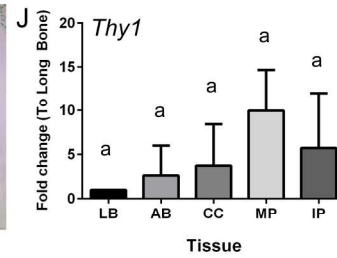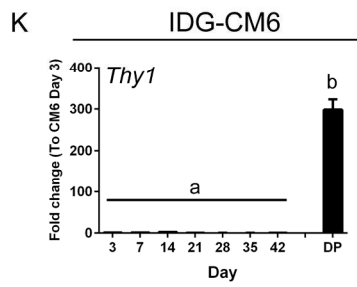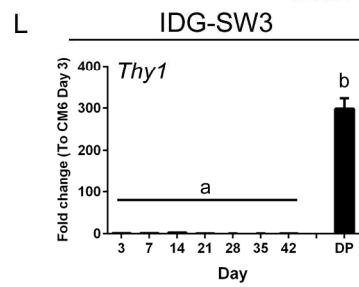

*Bglap*

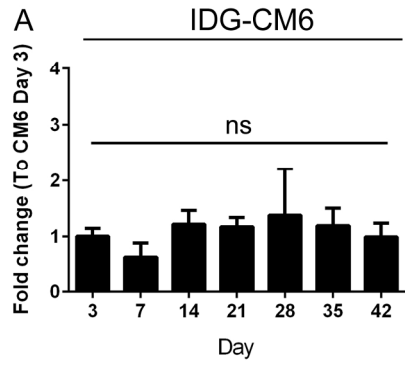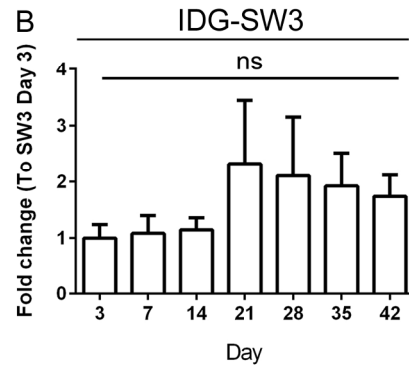

Supplement: NIHMS774076-supplement-Supp_Fig_S1-S2.pdf [file NIHMS774076-supplement-Supp_Fig_S1-S2.pdf]
